# Supplementary material for: Adenosine metabolism and murine strain-specific IL-4-induced inflammation, emphysema, and fibrosis
Source: JCI journal article supplement (doi:10.1172/jci26372), 2006-05-01
Supplement: sd1 [file 1]

# Supplemental Figure 1

**A1**

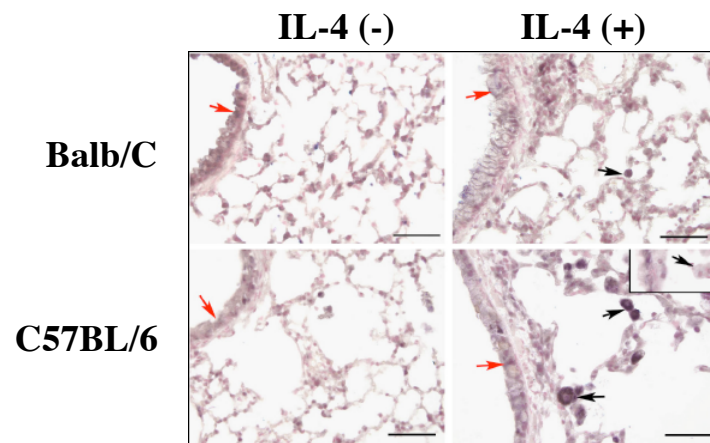

**A2B**

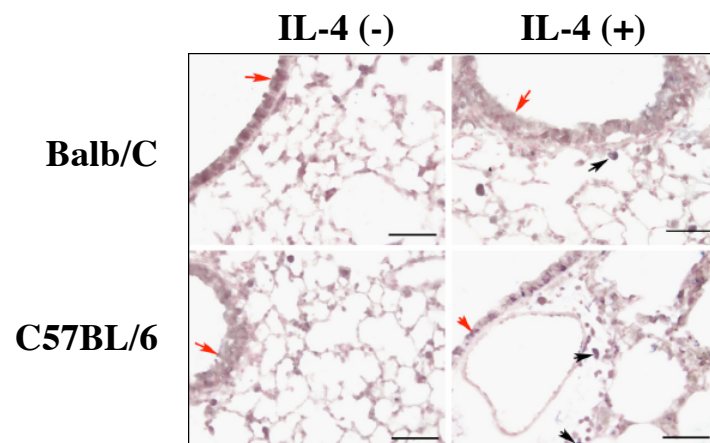

**A3**

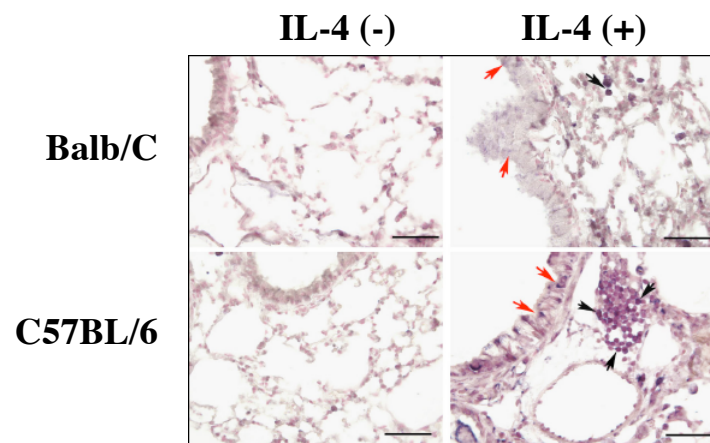

**Supplemental Figure 1.** Expression of adenosine receptors in the lungs of mice over expressing IL-4. Lungs sections from 3 month old wild type and IL-4 Tg Balb/c and C57Bl/6 mice were subjected to non radioactive in situ hybridization for detection of the various adenosine receptors ( A<sub>1</sub>AR, A2BAR, A3AR as noted Transcript levels of the A2AAR were undetectable and are not shown. Shown are sections hybridized with labeled antisense riboprobes for each of the adenosine receptors. Positive hybridization signal is purple. Hybridization with sense riboprobes were negative (see inset in A). Red arrow denote signal in epithelium of the bronchial airways. Black arrows denote signal in inflammatory cells. Scale bar = 100  $\mu$ m.

Supplemental Table-1 Real Time-RT-PCR Primers and Products

| Gene              |    | Primer Sequence (5' to 3')  | Product (bp) |
|-------------------|----|-----------------------------|--------------|
| IL-4R $\alpha$    | S  | 5'-cctcacactccacaccaatg-3'  | 168          |
|                   | AS | 5'-agcctgggttcctttaggt-3'   |              |
| IL-4R $\gamma$ c  | S  | 5'-tgcctagtgtggatgagctg-3'  | 170          |
|                   | AS | 5'-agggataagcacagctcca-3'   |              |
| IL-13R $\alpha$ 1 | S  | 5'-agcctggagaaaagtcgtca-3'  | 228          |
|                   | AS | 5'-ggcaccatTTTTgaggagaa-3'  |              |
| IL-13R $\alpha$ 2 | S  | 5'-gagcgaatggagtgaagagg-3'  | 151          |
|                   | AS | 5'-gctcaatgtgggttcagggtt-3' |              |

S=sense; AS=antisense
